# Supplementary material for: High-performance photodetectors, photocatalysts, and gas sensors based on polyol reflux synthesized porous ZnO nanosheets
Source: Royal Society of Chemistry journal article supplement (doi:10.1039/c2ce25278c), 2012-01-01
Supplement: c2ce25278c.pdf [file c2ce25278c.pdf]

Supporting Information for

# High-performance photodetectors, photocatalysts, and gas sensors based on polyol refluxing synthesized porous ZnO nanosheets

Bin Liu, Jing Xu, Sihan Ran, Zhuoran Wang, Di Chen,\* and Guozhen Shen\*

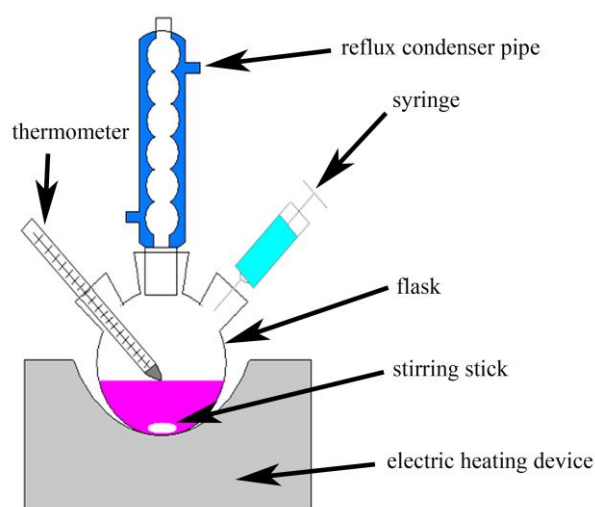

**Figure S1** Schematic illustration of the polyol refluxing system used for the fabrication of porous ZnO nanosheets.

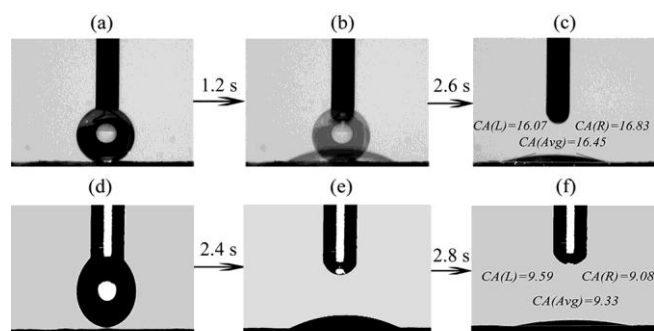

**Figure S2** (a)-(c) The changes of water droplet on the surface of porous ZnO nanosheets. (d)-(f) The changes of oleic acid droplet on the surface of porous ZnO nanosheets.
